# Supplementary material
Source: Research Square preprint supplement (doi:10.21203/rs.3.rs-9074615/v1)
Supplement: Supplementary file 1 [file 75e6b60e2b91a19c9e3ed198.docx]

**Supplementary materials**

1. **STUDY 1**

In Study 1, we recorded participants’ response time for making their initial and final decisions. We calculated the reaction time differences by subtracting the final decision time from the initial decision time. Descriptive values are shown in **Table 1**.

**Table 1.** Reaction Time Differences (*M* ± *SD* ms) Across Experimental Conditions

| **Advisor Type** | **Non-crisis Context** | **Crisis Context** |
| --- | --- | --- |
| Human Advisor | 415.92 ± 173.10 | 266.60 ± 136.46 |
| AI Advisor | 357.79 ± 187.80 | 112.39 ± 160.71 |

A repeated-measures ANOVA revealed a significant main effect of contexts, *F*(1, 115) = 9.03, *p* = .003, η²ₚ = .070; participants took significantly longer to respond in the non-crisis contexts compared to the crisis contexts. This difference likely reflects the experimental manipulation, in which participants were given a time limit for making decisions in the crisis contexts, whereas no such limits were applied in the non-crisis condition. The main effect of advisor type was not significant, *F*(1, 115) = 1.08, *p* = .301, indicating no significant difference in response times between human and AI advisors. Additionally, the interaction between contexts and advisor types was not significant, *F*(1, 115) = 0.54, *p* = .470, η²ₚ < .001.

1. **STUDY 2**

In Study 2, we also recorded participants’ response time for making their initial and final decisions. We calculated the reaction time differences by subtracting the final decision time from the initial decision time. Descriptive values are shown in **Table 2**.

**Table 2.** Reaction Time Differences (*M* ± *SD* ms) Across Experimental Conditions

| **Advisor Type** | **Prevention-Focused Advice** | **Promotion-Focused**  **Advice** |
| --- | --- | --- |
| Human Advisor | 205.81 ± 216.62 | 189.14 ± 138.01 |
| Non-anthropomorphic AI | 245.78 ± 225.10 | 185.87 ± 191.19 |
| Anthropomorphic AI | 245.42 ± 188.89 | 187.16 ± 179.00 |

A two-way ANOVA revealed no significant main effect of advice regulatory focus, *F*(1, 255) = 3.52, *p* = .062. The main effect of advisor type was also not significant, *F*(2, 255) = 0.26, *p* = .769. Additionally, there was no significant interaction between advice regulatory focus and advisor type, *F*(2, 255) = 0.34, *p* = .709.
